# Supplementary material for: Swine Gastrointestinal Microbiota and the Effects of Dietary Amino Acids on Its Composition and Metabolism
Source: MDPI journal article supplement (doi:10.3390/ijms25021237), 2024-01-19
Supplement: s1 [file s1]

**Supplemental Table S1.** A taxonomical list of the named bacteria commonly presented in swine gastrointestinal tract as reported in the literature <sup>1,2</sup>

| Phylum                                   | Class                                 | Order                  | Family                                                                                                                          | Genus | Species | (References) |
|------------------------------------------|---------------------------------------|------------------------|---------------------------------------------------------------------------------------------------------------------------------|-------|---------|--------------|
| <b>Actinomycetota (Actinobacteriota)</b> |                                       |                        |                                                                                                                                 |       |         |              |
|                                          | <b>Actinomycetes (Actinobacteria)</b> |                        |                                                                                                                                 |       |         |              |
|                                          | <b>Actinomycetales</b>                |                        |                                                                                                                                 |       |         |              |
|                                          | Actinomycetaceae                      |                        |                                                                                                                                 |       |         |              |
|                                          |                                       | <i>Actinomyces</i>     |                                                                                                                                 |       |         |              |
|                                          |                                       |                        | <i>bovis</i> ; <i>hyovaginalis</i> ; <i>suimastitidis</i> ; <i>urogenitalis</i>                                                 |       |         |              |
|                                          |                                       |                        | (Wylensek et al., 2020; Holman et al., 2022; Tan et al., 2017)                                                                  |       |         |              |
|                                          |                                       | <i>Mobiluncus</i>      |                                                                                                                                 |       |         |              |
|                                          |                                       |                        | <i>curtisii</i> ; <i>mulieris</i> ; <i>porci</i>                                                                                |       |         |              |
|                                          |                                       |                        | (Tan et al., 2017; Holman et al., 2022)                                                                                         |       |         |              |
|                                          |                                       | <i>Trueperella</i>     |                                                                                                                                 |       |         |              |
|                                          |                                       |                        | <i>pyogenes</i>                                                                                                                 |       |         |              |
|                                          |                                       |                        | (Tan et al., 2017; Holman et al., 2022)                                                                                         |       |         |              |
|                                          | <b>Bifidobacteriales</b>              |                        |                                                                                                                                 |       |         |              |
|                                          | Bifidobacteriaceae                    |                        |                                                                                                                                 |       |         |              |
|                                          |                                       | <i>Bifidobacterium</i> |                                                                                                                                 |       |         |              |
|                                          |                                       |                        | <i>animalis</i> ; <i>asteroides</i> ; <i>biavatii</i> ; <i>boum</i> ; <i>globosum</i> ; <i>longum</i> ; <i>kashiwanohense</i> ; |       |         |              |
|                                          |                                       |                        | <i>merycicum</i> ; <i>pseudolongum</i> ; <i>saeculare</i> ; <i>thermacidophilum</i> ; <i>thermophilum</i> ;                     |       |         |              |
|                                          |                                       |                        | <i>tsurumiense</i>                                                                                                              |       |         |              |
|                                          |                                       |                        | (Leser et al., 2002; Dowd et al., 2008; Tan et al., 2017; Wylensek et al., 2020, Holman et al., 2022; Gaio et al., 2021)        |       |         |              |
|                                          | <b>Catenulisporales</b>               |                        |                                                                                                                                 |       |         |              |

Catenulisporaceae

*Catenulispora*

*Acidiphila*

(Yang et al., 2017)

### **Geodermatophilales**

Geodermatophilaceae

*Blastococcus*

*saxobsidens*

(Yang et al., 2017)

### **Mycobacteriales (Corynebacteriales)**

Corynebacteriaceae

*Corynebacterium*

*ammoniogenes; diphtheriae; glucuronolyticum; kroppenstedtii; pseudotuberculosis; stationis; striatum; variabile; xerosis*

(Dowd et al., 2008; Tan et al., 2017; Wang et al., 2019; Wylensek et al., 2020)

Mycobacteriaceae (Mycobactericidal)

*Mycobacterium*

*tuberculosis*

(Quan et al., 2020)

Nocardiaceae

*Rhodococcus*

*coprophilus*

(Tan et al., 2017)

### **Micrococcales**

Micrococcaceae

*Arthrobacter*

sp.

(Wylensek et al., 2020)

*Kocuria*

sp.

(Dowd et al., 2008)

*Micrococcus*

*luteus*

(Wylensek et al., 2020)

*Rothia*

sp.

(Dowd et al., 2008)

Promicromonosporaceae

*Aneriacter*

sp.

(Luo et al., 2022)

*Cellulosimicrobium*

*aquatile; cellulans*

(Wang et al., 2019; Wylensek et al., 2020)

*Xylanimonas*

*cellulosilytica*

(Yang et al., 2017)

### **Micromonosporales**

Micromonosporaceae

*Actinoplanes*

*friuliensis; liguriensis; missouriensis*

(Yang et al., 2017)

### **Nakamurellales**

Nakamurellaceae

*Nakamurella*  
*multipartite*  
(Yang et al., 2017)

**Propionibacteriales**

Propionibacteriaceae  
*Propionibacterium*  
sp.  
(Collado and Sanz, 2007)

**Kitasatosporales**

Streptomycetaceae  
*Streptomyces*  
*xinghaiensis*; *koyangensis*  
(Tan et al., 2017; Wang et al., 2019)

**Coriobacteriia**

**Coriobacteriales**

Atopobiaceae  
*Atopobium*  
*deltae*; *parvulum*  
(Dowd et al., 2008; Wang et al., 2019; Wylensek et al., 2020)  
*Olsenella*  
*porci*; *umbonate*  
(Dowd et al., 2008; Wylensek et al., 2020)  
*Parafannyhessea*  
*umbonate*  
(Holman et al., 2022)  
*Paratractidigestivibacter*  
*faecalis*

(Holman et al., 2022)

*Parolsenella*

sp.

(Holman et al., 2022)

*Tractidigestivibacter*

sp.

(Holman et al., 2022)

Coriobacteriaceae

*Collinsella*

*aerofaciens; bouchesdurhonensis; tanakaei*

(Wylensek et al., 2020; Tan et al., 2017; Holman et al., 2022; Ortiz Sanjuán et al., 2022)

*Enorma*

*massiliensis*

(Tan et al., 2017; Holman et al., 2022)

## **Eggerthellales**

Eggerthellaceae

*Denitrobacterium*

*detoxificans*

(Tan et al., 2017; Wylensek et al., 2020)

*Eggerthella*

*lenta*

(Tan et al., 2017; Wylensek et al., 2020)

## **Thermoleophilia**

### **Solirubrobacterales**

Conexibacteraceae

*Conexibacter*

*woesei*

(Yang et al., 2017)

## **Bacillota (Firmicutes)**

### **Bacilli**

#### **Bacillales**

##### Bacillaceae

##### *Bacillus*

*altitudinis; sporothermodurans; velezensis*

(Leser et al., 2002; Dowd et al., 2008; Quan et al., 2020; Wylensek et al., 2020)

##### *Paucisalibacillus*

sp.

(Yin et al., 2018)

##### *Psychrobacillus*

sp.

(Wylensek et al., 2020)

##### Bacillales Family XI. Incertae Sedis<sup>3</sup>

##### *Gemella*

sp.

(Dowd et al., 2008)

##### Paenibacillaceae

##### *Aneurinibacillus*

*aneurinilyticus*

(Wylensek et al., 2020)

##### *Brevibacillus*

sp.

(Goodarzi et al., 2022)

##### Planococcaceae

*Kurthia*

*huakuii*

(Yang et al., 2017)

*Solibacillus*

*silvestris*

(Wang et al., 2019)

Staphylococcaceae

*Staphylococcus*

*aureus; capitis; cohnii; epidermidis; haemolyticus; hominis; phage; schleiferi*

(Robinson et al. 1981; Dowd et al., 2008; Quan et al., 2020; Tan et al., 2017; Wylensek et al., 2020)

## **Lactobacillales**

Aerococcaceae

*Abiotrophia*

sp.

(Dowd et al., 2008)

*Aerococcus*

*suis; urinaeequi*

(Dowd et al., 2008; Holman et al., 2022)

*Globicatella*

sp.

(Dowd et al., 2008)

Carnobacteriaceae

*Carnobacterium*

sp.

(Dowd et al., 2008; Tan et al., 2017)

*Granulicatella*

sp.

(Dowd et al., 2008; Tan et al., 2017)

## Enterococcaceae

### *Enterococcus*

*cecorum; faecalis; faecium; gallinarum; hirae*

(Dowd et al., 2008; Holman et al., 2022; Wylensek et al., 2020)

### *Tetragenococcus*

*sp.*

(Dowd et al., 2008)

### *Vagococcus*

*teuberi*

(Wang et al., 2019)

## Lactobacillaceae

### *Lactobacillus*

*acidophilus; agilis; amylophilus; amylovorus; animalis; backii; crispatus; delbrueckii; equicursoris; fermentum; gallinarum; helveticus; ingluviei; johnsonii; kitasatonis; mucosae; paralimentarius; pasteurii; plantarum; porci; reuteri; ruminis; salivarius*

(Robinson et al. 1981, 2005; Pryde et al., 1999; Leser et al., 2002; Li et al., 2003; Hill et al., 2005; Dowd et al., 2008; Dai et al. 2010; Li and Young, 2013; Kelly et al., 2017; Quan et al., 2018; Tan et al., 2017; Wylensek et al., 2020; Gaio et al., 2021; Liu et al., 2021; Holman et al., 2022)

### *Ligilactobacillus*

*agilis; animalis; salivarius; ruminis*

(Holman et al., 2022)

### *Limosilactobacillus*

*coleohominis; mucosae; reuteri; vaginalis*

(Holman et al., 2022)

### *Oenococcus*

*oeni*



(Tan et al., 2017)

*Pediococcus*

*damnosus*

(Hill et al., 2005; Tan et al., 2017)

*Weissella*

sp.

(Dowd et al., 2008)

Streptococcaceae

*Lactococcus*

*garvieae; lactis*

(Dowd et al., 2008; Li and Young, 2013; Ortiz Sanjuán et al., 2022)

*Streptococcus*

*alactolyticus; anginosus; constellatus; criceti; equinus; faecium; gallolyticus; hyointestinalis; hyovaginalis; infantarius; intermedius; lutetiensis; macedonicus; orisratti; pasteurianus; pneumoniae; pyogenes; suis; thermophilus; vestibularis*

(Robinson et al. 1981, 2005; Dowd et al., 2008; Dai et al., 2010; Li and Young, 2013; Quan et al., 2018; Tan et al., 2017; Wang et al., 2019; Wylensek et al., 2020; Liu et al., 2021; Holman et al., 2022)

## **Bacillota sensu stricto incertae sedis<sup>3</sup>**

### **Order?**

Family?

*Negativibacillus*

*massiliensis*

(Holman et al., 2022)

## **Clostridia**

### **Eubacteriales**

Anaerovoracaceae

*Genus?*

sp.

(Reyer, Henry, et al., 2021)

Cellulosilyticaceae

*Cellulosilyticum*

sp.

(Gao et al., 2023)

Christensenellaceae

*Catabacter*

*hongkongensis*

(Tan et al., 2017)

*Christensenella*

*minuta*

(Tan et al., 2017)

Clostridiaceae

*Butyricicoccus*

*porcorum; pullicaecorum*

(Tan et al., 2017; Holman et al., 2022)

*Clostridium*

*asparagiforme; beijerinckii; bolteae; botulinum; butyricum; cadaveris; celerecrescens; cellulosi; citroniae; clostridioforme; cochlearium; difficile; indolis; innocuum; methylpentosum; perfringens; porci; saccharolyticum; scindens; sphenoides; sporosphaeroides; symbiosum*

(Pryde et al., 1999; Leser et al., 2002; Dowd et al., 2008; Isaacson and Kim, 2012; Quan et al., 2018, 2020; Wylensek et al., 2020; Holman et al., 2022)

*Hungatella*

*hathewayi*

(Tan et al., 2017; Holman et al., 2022)

*Natronincola*

sp.  
(Dowd et al., 2008)  
*Oxobacter*  
sp.  
(Leser et al., 2002)  
*Paraclostridium*  
sp.  
(Wylensek et al., 2020)  
*Sarcina*  
*maxima*  
(Leser et al., 2002; Dowd et al., 2008)  
Desulfitobacteriaceae  
*Desulfitobacterium*  
sp.  
(Leser et al., 2002)  
*Syntrophobotulus*  
sp.  
(Leser et al., 2002)  
Desulfitomaculaceae  
*Desulfitomaculum*  
sp.  
(Leser et al., 2002)  
*Pelotomaculum*  
sp.  
(Tan et al., 2017)  
Eubacteriaceae  
*Eubacterium*

*brachy; callanderi; coprostanoligenes; hallii; innocuum; limosum; plexicaudatum; pyruvativorans; ramulus; rectale; xylanophilum*

(Robinson et al. 1981; Pryde et al., 1999; Leser et al., 2002; Dowd et al., 2008; Tan et al., 2017; Liu et al., 2021; Ortiz Sanjuán et al., 2022; Holman et al., 2022)

*Pseudoramibacter*

sp.

(Leser et al., 2002)

Eubacteriales incertae sedis<sup>3</sup>

*Gemmiger*

*formicilis*

(Liu et al., 2021; Holman et al., 2022)

*Intestinimonas*

*butyriciproducens; massiliensis*

(Tan et al., 2017; Holman et al., 2022; Ortiz Sanjuán et al., 2022)

Eubacteriales Family XII. Incertae Sedis

*Acidaminobacter*

sp.

(Leser et al., 2002)

Eubacteriales Family XIII. Incertae Sedis

*Anaerovorax*

sp.

(Gao et al., 2023)

*Emergencia*

sp.

(Holman et al., 2022)

*Mogibacterium*

sp.

(Wylensek et al., 2020)

Lachnospiraceae

*Acetitomaculum*

sp.

(Leser et al., 2002)

*Agathobacter*

sp.

(Holman et al., 2022)

*Anaerobutyricum*

*soehngenii*

(Wylensek et al., 2020; Holman et al., 2022)

*Anaerostipes*

*caccae; hadrus*

(Tan et al., 2017; Holman et al., 2022; Ortiz Sanjuán et al., 2022)

*Anaerotignum*

sp.

(Holman et al., 2022)

*Bariatricus*

sp.

(Holman et al., 2022)

*Bilifractor*

sp.

(Holman et al., 2022)

*Blautia*

*hansenii; hydrogenotrophica; massiliensis; obeum; producta; schinkii; wexlerae*

(Tan et al., 2017; Holman et al., 2022; Ortiz Sanjuán et al., 2022)

*Butyribacter*

sp.

(Holman et al., 2022)

*Butyrivibrio*

*crossotus; fibrisolvens; hungatei; proteoclasticus*

(Robinson et al. 1981; Leser et al., 2002; Holman et al., 2022; Ortiz Sanjuán et al., 2022)

*Coprococcus*

*catus; comes; eutactus; nexilis*

(Leser et al., 2002; Tan et al., 2017; Liu et al., 2021; Holman et al., 2022)

*Cuneatibacter*

sp.

(Holman et al., 2022)

*Dorea*

*formicigenerans; longicatena*

(Dowd et al., 2008; Tan et al., 2017; Holman et al., 2022)

*Eisenbergiella*

sp.

(Holman et al., 2022)

*Enterocloster*

*aldenensis; clostridioformis*

(Holman et al., 2022)

*Epulopiscium*

sp.

(Leser et al., 2002)

*Faecalicatena*

*contorta; faecis; glycyrrhizinilyticum; gnavus; lactaris; orotica; torques*

(Gaio et al., 2021)

*Faecalimonas*

*umbilicate*

(Holman et al., 2022)

*Fusicatenibacter*

*saccharivorans*  
(Holman et al., 2022)

*Johnsonella*  
sp.  
(Leser et al., 2002)

*Kineothrix*  
sp.  
(Holman et al., 2022)

*Lachnoanaerobaculum*  
*saburreum*  
(Tan et al., 2017)

*Lachnobacterium*  
sp.  
(Dowd et al., 2008)

*Lachnoclostridium*  
*mordavella*; *phocaeense*; *phytofermentans*  
(Tan et al., 2017; Wylensek et al., 2020; Liu et al., 2021; Ortiz Sanjuán et al., 2022)

*Lachnospira*  
sp.  
(Dowd et al., 2008; Holman et al., 2022)

*Marvinbryantia*  
sp.  
(Holman et al., 2022)

*Mediterraneibacter*  
*faecis*  
(Holman et al., 2022)

*Muricomes*  
sp.

(Holman et al., 2022)  
*Oribacterium*  
sp.  
(Holman et al., 2022)  
*Parasporobacterium*  
sp.  
(Dowd et al., 2008)  
*Pseudobutyrvibrio*  
*ruminis*  
(Leser et al., 2002)  
*Roseburia*  
*faecis; hominis; intestinalis; inulinivorans*  
(Dowd et al., 2008; Kelly et al., 2017; Tan et al., 2017; Liu et al., 2021; Holman et al., 2022; Ortiz Sanjuán et al., 2022)  
*[Ruminococcus]*  
*gnavus; lactaris; torques*  
(Holman et al., 2022)  
*Schaedlerella*  
sp.  
(Holman et al., 2022)  
*Sporofaciens*  
sp.  
(Holman et al., 2022)  
*Stomatobaculum*  
*longum*  
(Tan et al., 2017)  
*Velocimicrobium*  
*porci*



(Wylensek et al., 2020)

*Weimeria*

sp.

(Holman et al., 2022)

Oscillospiraceae

*Acetivibrio*

*ethanolgignens*

(Dowd et al., 2008; Tan et al., 2017)

*Agathobaculum*

*butyriciproducens*

(Tan et al., 2017; Holman et al., 2022)

*Anaerofilum*

sp.

(Leser et al., 2002)

*Anaerotruncus*

sp.

(Tan et al., 2017)

*Angelakisella*

sp.

(Gaio et al., 2021)

*Dysosmobacter*

sp.

(Gaio et al., 2021; Holman et al., 2022)

*Flavonifractor*

*plautii*

(Holman et al., 2022; Ortiz Sanjuán et al., 2022)

*Faecalibacterium*

*prausnitzii*

(Dowd et al., 2008; Kelly et al., 2017; Tan et al., 2017; Liu et al., 2021; Holman et al., 2022)

*Fournierella*

*excrementarium*

(Holman et al., 2022)

*Lawsonibacter*

sp.

(Holman et al., 2022)

*Monoglobus*

sp.

(Holman et al., 2022)

*Oscillibacter*

*ruminantium; valericigenes*

(Tan et al., 2017)

*Oscillospira*

sp.

(Dowd et al., 2008)

*Pseudoflavonifractor*

*capillosus*

(Holman et al., 2022)

*Pygmaibacter*

sp.

(Holman et al., 2022)

*Ruminococcus*

*bromii; callidus; champanellensis; flavefaciens; gauthreauii*

(Pryde et al., 1999; Leser et al., 2002; Dowd et al., 2008; Quan et al., 2020; Tan et al., 2017; Liu et al., 2021; Holman et al., 2022)

*Ruthenibacterium*

*lactatiformans*

(Hu et al., 2022)

*Sporobacter*

sp.

(Leser et al., 2002)

*Subdoligranulum*

*variabile*

(Liu et al., 2021; Holman et al., 2022)

Peptococcaceae

*Peptococcus*

sp.

(Leser et al., 2002)

Peptostreptococcaceae

*Clostridioides*

*difficile*

(Quan et al., 2020)

*Intestinibacter*

sp.

(Holman et al., 2022)

*Peptostreptococcus*

*anaerobius*

(Robinson et al. 1981; Pryde et al., 1999; Dowd et al., 2008; Tan et al., 2017)

*Romboutsia*

sp.

(Quan et al., 2020; Wang et al., 2019; Holman et al., 2022)

*Terrisporobacter*

*ilealis; timonensis*

(Liu et al., 2021; Holman et al., 2022)

## **Erysipelotrichia**

### **Erysipelotrichales**

#### Coprobacillaceae

##### *Catenibacterium*

###### *mitsuokai*

(Dowd et al., 2008; Holman et al., 2022)

##### *Erysipelatoclostridium*

###### *ramosum*

(Holman et al., 2022)

##### *Sharpea*

###### sp.

(Wylensek et al., 2020)

#### Erysipelotrichaceae

##### *Absicoccus*

###### *porci*

(Holman et al., 2022)

##### *Allobaculum*

###### *stercoricanis*

(Tan et al., 2017)

##### *Bulleidia*

###### sp.

(Dowd et al., 2008; Holman et al., 2022)

##### *Catenisphaera*

###### sp.

(Gao et al., 2023)

##### *Faecalicoccus*

###### *pleomorphus*

(Holman et al., 2022)

*Faecalibaculum*

*rodentium*

(Ortiz Sanjuán et al., 2022)

*Faecalitalea*

*cylindroides; pleomorphus*

(Tan et al., 2017; Wylensek et al., 2020)

*Floccifex*

*porci*

(Holman et al., 2022)

*Holdemanella*

*biformis; porci*

(Gaio et al., 2021; Holman et al., 2022)

*Holdemania*

sp.

(Leser et al., 2002)

*Solobacterium*

*moorei*

(Gaio et al., 2021)

Turicibacteraceae

*Turicibacter*

*sanguinis*

(Dowd et al., 2008; Wang et al., 2019; Quan et al., 2020)

## **Negativicutes**

### **Acidaminococcales**

Acidaminococcaceae

*Acidaminococcus*

*fermentans*

(Leser et al., 2002; Dowd et al., 2008; Dai et al. 2010; Tan et al., 2017; Wylensek et al., 2020; Ortiz Sanjuán et al., 2022)

*Phascolarctobacterium*

*succinatutens*

(Leser et al., 2002; Tan et al., 2017; Gaio et al., 2021; Holman et al., 2022)

*Succiniclasicum*

sp.

(Leser et al., 2002; Holman et al., 2022)

## **Selenomonadales**

Selenomonadaceae

*Mitsuokella*

*jalaludinii*

(Holman et al., 2022)

*Pectinatus*

sp.

(Leser et al., 2002)

*Selenomonas*

*bovis; ruminantium*

(Robinson et al., 1981; Pryde et al., 1999; Isaacson and Kim, 2012; Tan et al., 2017; Liu et al., 2021; Holman et al., 2022)

Sporomusaceae

*Sporomusa*

sp.

(Leser et al., 2002)

## **Veillonellales**

Veillonellaceae

*Caecibacter*

*massiliensis*

(Wylensek et al., 2020; Holman et al., 2022)

*Dialister*

*succinatiphilus*

(Leser et al., 2002)

*Megasphaera*

*elsdenii; hexanoica*

(Wylensek et al., 2020; Holman et al., 2022)

*Veillonella*

*atypica; caviae; seminalis*

(Li et al., 2003; Dowd et al., 2008; Tan et al., 2017)

## **Tissierellia**

### **Tissierellales**

Peptoniphilaceae

*Anaerovibrio*

*lipolytica; slackiae*

(Dowd et al., 2008; Dai et al. 2010; He et al., 2016; Wylensek et al., 2020; Holman et al., 2022)

*Anaerococcus*

sp.

(Dowd et al., 2008)

*Finegoldia*

*magna*

(Dowd et al., 2008)

*Parvimonas*

sp.

(Holman et al., 2022)

*Peptoniphilus*  
sp.  
(Dowd et al., 2008)  
Sporanaerobacteraceae  
*Anaerosalibacter*  
*bizertensis*  
(Wylensek et al., 2020)  
Tissierellia incertae sedis<sup>3</sup>  
*Ezakiella*  
sp.  
(Holman et al., 2022)

## **Bacteroidota (Bacteroidetes)**

### **Bacteroidia**

#### **Bacteroidales**

##### Bacteroidaceae

###### *Bacteroides*

*caecimuris; dorei; eggerthii; fragilis; helcogenes; heparinolyticus; ovatus; pyogenes; salanitronis; stercoris; thetaiotaomicron; uniformis; vulgatus; xylanisolvans*  
(Robinson et al., 1981; Pryde et al., 1999; Leser et al., 2002; Dowd et al., 2008; Wylensek et al., 2020; Holman et al., 2022; Ortiz Sanjuán et al., 2022)

###### *Phocaeicola*

*plebeius; vulgatus*  
(Holman et al., 2022)

##### Barnesiellaceae

###### *Barnesiella*

*intestinihominis; viscericola*  
(Yang et al., 2017)



Dysgonomonadaceae

*Butyricimonas*

*virosa*

(Holman et al., 2022)

*Fermentimonas*

*caenicola*

(Tan et al., 2017)

*Odoribacter*

sp.

(Holman et al., 2022)

*Proteiniphilum*

*saccharofermentans*

(Yang et al., 2017)

Muribaculaceae

*Duncaniella*

sp.

(Kim et al., 2023)

Paludibacteraceae

*Paludibacter*

sp.

(Kim et al., 2023)

Porphyromonadaceae

*Porphyromonas*

sp.

(Leser et al., 2002; Tan et al., 2017; Holman et al., 2022)

Prevotellaceae

*Alloprevotella*

sp.

(Quan et al., 2018)

*Hallella*

*seregens*

(Tan et al., 2017)

*Paraprevotella*

sp.

(Quan et al., 2020)

*Prevotella*

*copri; dentalis; enoeca; fusca; intermedia; jejuni; melaninogenica; nigrescens; oralis; ruminicola*

(Leser et al., 2002; Isaacson and Kim, 2012; Kelly et al., 2017; Zhang et al., 2018; Tan et al., 2017; Quan et al., 2020; Wylensek et al., 2020; Ortiz Sanjuán et al., 2022)

Rikenellaceae

*Alistipes*

*senegalensis; shahii*

(Quan et al., 2020; Liu et al., 2021; Holman et al., 2022)

*Rikenella*

sp.

(Leser et al., 2002)

Tannerellaceae

*Parabacteroides*

*distasonis; faecavium; merdae*

(Quan et al., 2020; Wylensek et al., 2020; Holman et al., 2022)

*Tannerella*

sp.

(Tan et al., 2017)

**Marinilabiliales**

Marinifilaceae

*Marinifilum*

sp.

(Bai et al., 2021)

## **Cytophagia**

### **Cytophagales**

Cytophagaceae

*Cytophaga*

sp.

(Leser et al., 2002)

Flexibacteraceae

*Flexibacter*

sp.

(Leser et al., 2002)

## **Flavobacteriia**

### **Flavobacteriales**

Weeksellaceae

*Bergeyella*

sp.

(Dowd et al., 2008)

*Chryseobacterium*

*gallinarum*

(Dowd et al., 2008; Ortiz Sanjuán et al., 2022)

## **Campylobacterota**

### **Epsilonproteobacteria**

#### **Campylobacterales**

Campylobacteraceae

*Campylobacter*

*coli; hominis; lanienae; jejuni*

(Dowd et al., 2008; Kelly et al., 2017; Holman et al., 2022)

Helicobacteraceae

*Helicobacter*

*bilis; mustelae; trogontum*

(Dowd et al., 2008; Kelly et al., 2017; Tan et al., 2017; Holman et al., 2022)

## **Chlamydiota**

### **Chlamydiia**

#### **Chlamydiales**

Chlamydiaceae

*Chlamydia*

*suis; trachomatis*

(Quan et al., 2020; Tan et al., 2017; Liu et al., 2021; Holman et al., 2022)

## **Cyanobacteriota (Cyanobacteria or Cyanophyta)**

### **Cyanophyceae**

#### **Oscillatoriales**

Microcoleaceae

*Microcoleus*

sp.

(Yang et al., 2017)

## **Deferribacterota**

### **Deferribacteres**

## **Deferribacterales**

Flexistipitaceae

*Flexistipes*

sp.

(Leser et al., 2002)

Mucispirillaceae

*Mucispirillum*

*faecigallinarum*

(Holman et al., 2022)

## **Elusimicrobiota (Termite Group 1)**

### **Elusimicrobia**

#### **Elusimicrobiales**

Elusimicrobiaceae

*Elusimicrobium ?*

sp.

(Holman et al., 2022)

## **Fibrobacterota**

### **Fibrobacteria**

#### **Fibrobacterales**

Fibrobacteraceae

*Fibrobacter*

*intestinalis; succinogenes*

(Dowd et al., 2008; Wylensek et al., 2020; Ortiz Sanjuán et al., 2022)

*Hallerella*

sp.

(Holman et al., 2022)

## **Fusobacteriota**

### **Fusobacteriia**

#### **Fusobacteriales**

Fusobacteriaceae

*Fusobacterium*

*mortiferum; necrophorum; perfoetens; varium*

(Robinson et al. 1981; Gaskins 2001; Leser et al., 2002; Dowd et al., 2008; Wylensek et al., 2020)

Leptotrichiaceae

*Leptotrichia*

*buccalis*

(Robinson et al. 1981; Dowd et al., 2008)

## **Gemmatimonadota**

### **Gemmatimonadetes**

#### **Gemmatimonadales**

Gemmatimonadaceae

*Gemmatimonas*

*aurantiaca*

(Yang et al., 2017)

## **Lentisphaerota (Lentisphaerae)**

### **Lentisphaeria**

#### **Victivallales**

Victivallaceae

*Victivallis*  
*vadensis*  
(Holman et al., 2022)

## **Mycoplasmatota (Tenericutes)**

### **Mollicutes**

#### **Acholeplasmatales**

Acholeplasmataceae

*Acholeplasma*

sp.

(Leser et al., 2002)

#### **Anaeroplasmatales**

Anaeroplasmataceae

*Anaeroplasma*

sp.

(Holman et al., 2022)

*Asteroleplasma*

sp.

(Dowd et al., 2008; Holman et al., 2022)

#### **Entomoplasmatales**

Spiroplasmataceae

*Spiroplasma*

sp.

(Dowd et al., 2008)

#### **Mycoplasmatales**

Mycoplasmataceae

*Mycoplasma*

sp.

(Leser et al., 2002; Tan et al., 2017; Liu et al., 2021)

## **Planctomycetota (Planctomycetes)**

### **Planctomycetia**

#### **Planctomycetales**

Planctomycetaceae

*Planctomyces*

sp.

(Leser et al., 2002)

## **Pseudomonadota (Proteobacteria)**

### **Alphaproteobacteria**

#### **Hyphomicrobiales**

Beijerinckiaceae

*Beijerinckia*

*indica*

(Yang et al., 2017)

*Methylocapsa*

*acidiphila*

(Yang et al., 2017)

Nitrobacteraceae

*Nitrobacter*

*hamburgensis; winogradskyi*

(Yang et al., 2017)

*Rhodopseudomonas*

sp.



(Dowd et al., 2008)

Parvibaculaceae

*Parvibaculum*

*lavamentivorans*

(Yang et al., 2017)

Rhizobiaceae

*Allorhizobium*

sp.

(Yang et al., 2017)

*Ensifer*

sp.

(Dowd et al., 2008)

*Neorhizobium*

*galegae*

(Yang et al., 2017)

*Pararhizobium*

sp.

(Yang et al., 2017)

*Rhizobium*

*oryzae*

(Yang et al., 2017)

Xanthobacteraceae

*Starkeya*

*novella*

(Yang et al., 2017)

**Rhodobacterales**

Paracoccaceae

*Rhodobacter*

sp.  
(Dowd et al., 2008)

*Rhodovulum*

sp.  
(Dowd et al., 2008)

### **Rhodospirillales**

Azospirillaceae

*Azospirillum*

*brasiliense; lipoferum*  
(Yang et al., 2017)

### **Sphingomonadales**

Sphingomonadaceae

*Sphingobium*

sp.  
(Tan et al., 2017)

*Sphingomonas*

sp.  
(Li et al., 2019)

## **Betaproteobacteria**

### **Burkholderiales**

Comamonadaceae

*Alicyclophilus*

*denitrificans*  
(Yang et al., 2017)

*Aquabacterium*

sp.  
(Yin et al., 2018)

*Comamonas*

*kerstersii; testosteroni*

(Yang et al., 2017; Wang et al., 2019)

Sutterellaceae

*Mesosutterella*

sp.

(Holman et al., 2022)

*Sutterella*

*parvirubra; wadsworthensis*

(Holman et al., 2022)

## **Neisseriales**

Neisseriaceae

*Neisseria*

*perflava*

(Holman et al., 2022)

Oxalobacteraceae

*Massilia*

sp.

(Li et al., 2019)

*Oxalobacter*

*formigenes*

(Tan et al., 2017)

## **Rhodocyclales**

Rhodocyclaceae

*Genus?*

sp.

(Reddy et al., 2021)

Zoogloeaceae

*Thauera*

*selenatis*

(Tan et al., 2017)

## **Gammaproteobacteria**

### **Aeromonadales**

Succinivibrionaceae

*Anaerobiospirillum*

*succiniciproducens*

(Holman et al., 2022)

*Succinivibrio*

*dextrinosolvens*

(Dai et al., 2010)

### **Alteromonadales**

Idiomarinaceae

*Idiomarina*

sp.

(Yang et al., 2017)?

### **Enterobacterales**

Enterobacteriaceae

*Citrobacter*

*rodentium*

(Ortiz Sanjuán et al., 2022)

*Enterobacter*

*asburiae*

(Isaacson and Kim, 2012)

*Escherichia*

*coli; fergusonii; flexneri*

(Leser et al., 2002; Dai et al., 2010; Kelly et al., 2017; Wylensek et al., 2020; Tan et al., 2017; Wang et al., 2019; Gaio et al., 2021; Holman et al., 2022)

*Klebsiella*

*pneumoniae*

(Dai et al., 2010; Wang et al., 2019)

*Pluralibacter*

*gergoviae*

(Tan et al., 2017)

*Salmonella*

*enterica*

(Wang et al., 2019; Dowd et al., 2008)

*Shigella*

*boydii; sonnei*

(Li et al., 2003)

Hafniaceae

*Hafnia*

*alvei*

(Li and Young, 2013)

Morganellaceae

*Photorhabdus*

*luminescens*

(Tan et al., 2017)

*Morganella*

*morganii*

(Li and Young, 2013)

Vibrionaceae

*Vibrio*

sp.  
(Mukhopadhyaya et al., 2012)

Yersiniaceae

*Serratia*

*marcescens*

(Tan et al., 2017)

### **Moraxellales**

Moraxellaceae

*Acinetobacter*

sp.

(Dowd et al., 2008; Tan et al., 2017)

### **Pasteurellales**

Pasteurellaceae

*Actinobacillus*

*porcinus*

(Holman et al., 2022)

*Haemophilus*

*parainfluenzae; pittmaniae*

(Tan et al., 2017)

*Pasteurella*

*bettyae*

(Tan et al., 2017)

### **Pseudomonadales**

Pseudomonadaceae

*Pseudomonas*

*putida*

(Leser et al., 2002; Dai et al., 2010; Tan et al., 2017)

**Xanthomonadales**

Xanthomonadaceae

*Stenotrophomonas*

sp.

(Dowd et al., 2008)

**Spirochaetota**

**Spirochaetia**

**Sphaerochaetales**

Sphaerochaetaceae

*Bullifex*

*porci*

(Holman et al., 2022)

**Spirochaetales**

Spirochaetaceae

*Spirochaeta*

sp.

(Dowd et al., 2008; Tan et al., 2017; Wylensek et al., 2020)

Treponemataceae

*Treponema*

*berlinense; brennaborensis; bryantii; porcinum; succinifaciens; vincentii*

(Leser et al., 2002; Nordhoff et al., 2005; Quan et al., 2020; Wylensek et al., 2020; Liu et al., 2021; Holman et al., 2022)

**Synergistota**

**Synergistia**

**Synergistales**

Acetomicrobiaceae

*Acetomicrobium*

*Anaerobaculum*

(Leser et al., 2002)

Dethiosulfovibrionaceae

*Pyramidobacter*

sp.

(Wylensek et al., 2020; Holman et al., 2022)

Synergistaceae

*Cloacibacillus*

*porcorum*

(Wang et al., 2019; Wylensek et al., 2020; Holman et al., 2022)

## **Thermodesulfobacteriota**

### **Desulfovibrionia**

#### **Desulfovibrionales**

Desulfovibrionaceae

*Bilophila*

*wadsworthia*

(Gaio et al., 2021; Holman et al., 2022)

*Desulfovibrio*

*piger; porci*

(Wylensek et al., 2020)

*Lawsonia*

*intracellularis*

(Quan et al., 2020)

### **Desulfuromonadia**



**Geobacterales**

Geobacteraceae

*Geobacter*

*soli*

(Tan et al., 2017)

**Verrucomicrobiota**

**Verrucomicrobiota (Verrucomicrobia)**

**Verrucomicrobiales**

Akkermansiaceae

*Akkermansia*

*muciniphila*

(Holman et al., 2022)

---

<sup>1</sup> It is better to read this table in “Web Layout” view and with “Navigation Pane” open for a quick navigation. For each taxonomical level (Phylum, Class, Order, Family, Genus, or Species), the names are listed in the alphabetic order. Each of the levels (except for the Species level) can be collapsed or expanded by hovering your computer-mouse pointer to the immediate left of the level name until a small black triangle showing up, and then clicking on this small black triangle.

<sup>2</sup> The nomenclature and classification of this table followed the NCBI Taxonomy housed in National Library of Medicine (<https://www.ncbi.nlm.nih.gov/taxonomy>). The words in parentheses after those taxonomic names are the corresponding names previously used, and in fact many of them are currently still in use in the literature.

<sup>3</sup> This phrase, *incertae sedis*, indicates that the name associated with it is an uncertain taxonomic rank or name.
